# Supplementary material
Source: MDPI journal article supplement (https://www.mdpi.com/2073-4395/14/5/916)
Supplement: s1 [file s1]

Table S1. Raw material used in the fertilizers formulation.

| Raw Material                                                       | Units | Control | PKA   | PA    | PD    | ST    |
|--------------------------------------------------------------------|-------|---------|-------|-------|-------|-------|
| NH <sub>3</sub>                                                    | mL    | 1,19    | 1.95  | 1.94  | 1.94  | 2.59  |
| (NH <sub>4</sub> ) <sub>2</sub> SO <sub>4</sub>                    | g     | 9,52    | 14.29 | 14.29 | 14.29 | 11.90 |
| H <sub>3</sub> PO <sub>4</sub>                                     | mL    | 2,40    | 2.40  | 1.20  | 1.20  | 1.80  |
| (NH <sub>4</sub> ) <sub>2</sub> (HPO <sub>4</sub> ) in solid state | g     | 13,04   | 8.70  | 4.35  | 4.35  | 4.35  |
| KCl                                                                | g     | 25,00   | 18.33 | 23.70 | 25.00 | 25.00 |
| Clay                                                               | g     | 38,96   | 8.00  | 14.69 | 14.16 | 22.82 |
| Bio-based raw material                                             | g     | 0       | 33.33 | 18.18 | 21.45 | 17.28 |
| H <sub>2</sub> SO <sub>4</sub>                                     | mL    | 5.00    | 5.00  | 5.00  | 5.00  | 5.00  |
| (NH <sub>4</sub> ) <sub>2</sub> (HPO <sub>4</sub> ) PR*            | g     | 15,22   | 10.87 | 15.22 | 15.22 | 14.13 |
| NH <sub>3</sub> PR*                                                | mL    | 14,73   | 10.52 | 14.73 | 14.73 | 13.68 |
| H <sub>3</sub> PO <sub>4</sub> PR*                                 | mL    | 8,41    | 6.01  | 8.41  | 8.41  | 7.81  |

\* PR: Pipe Reactor. (NH<sub>4</sub>)<sub>2</sub>(HPO<sub>4</sub>) RT means DAP slurry produced in the pipe reactor (which is different from DAP granulate produced in solid state). So, NH<sub>3</sub> PR and H<sub>3</sub>PO<sub>4</sub> PR are the ammonium and the phosphoric acid involved in the reaction of DAP production in the PR.

Table S2. Results of soil analysis used in microcosms assay.

| Parameter                                                     | Value      |
|---------------------------------------------------------------|------------|
| Textures (USDA)                                               | Sand 58%   |
|                                                               | Silt 22%   |
|                                                               | Clay 20%   |
| Soil Texture Class (USDA)                                     | Sandy-loam |
| pH (measured in water)                                        | 7.93       |
| Carbonates (% limestone)                                      | 7.15       |
| Organic matter (%)                                            | 1.87       |
| Total nitrogen (%)                                            | 0.13       |
| C/N ratio                                                     | 8.38       |
| Phosphorus (Olsen) (ppm)                                      | 13.51      |
| Calcium (cmol (+) kg <sup>-1</sup> )                          | 20.69      |
| Magnesium (cmol (+) kg <sup>-1</sup> )                        | 0.80       |
| Potassium (cmol (+) kg <sup>-1</sup> )                        | 1.27       |
| Sodium (cmol (+) kg <sup>-1</sup> )                           | 0.02       |
| Ca/Mg ratio                                                   | 25.84      |
| K/Mg ratio                                                    | 1.58       |
| C.E.C (Cation exchange capacity (cmol (+) kg <sup>-1</sup> )) | 12.46      |
| Manganese (ppm)                                               | 7.19       |
| Iron (ppm)                                                    | 12.96      |
| Copper (ppm)                                                  | 1.19       |
| Zinc (ppm)                                                    | 0.84       |
| Boron (ppm)                                                   | 3.30       |
| Conductivity (dS/m)                                           | 0.13       |
