# Supplementary material
Source: MDPI journal article supplement (https://www.mdpi.com/2073-4395/14/5/916)
Supplement: s1 [file s1]

SIMPER  
Similarity Percentages - species contributions

One-Way Analysis

*Data worksheet*

Name: Data1

Data type: Abundance

Sample selection: All

Variable selection: All

*Parameters*

Resemblance: S17 Bray-Curtis similarity

Cut off for low contributions: 30,00%

*Factor Groups*

| Sample | Treatment |
|--------|-----------|
|--------|-----------|

|     |     |
|-----|-----|
| C-  | C-  |
| C+  | C+  |
| PKA | PKA |
| PA  | PA  |
| PD  | PD  |
| ST  | ST  |

# Groups C- & C+

Average dissimilarity = 27,71

|                         | Group C- | Group C+ |         |         |          |       |
|-------------------------|----------|----------|---------|---------|----------|-------|
| Species                 | Av.Abund | Av.Abund | Av.Diss | Diss/SD | Contrib% | Cum.% |
| Achromobacter           | 0,45     | 1,61     | 0,50    | 1,34    | 1,82     | 1,82  |
| Tychonema CCAP_1459-11B | 1,25     | 0,56     | 0,38    | 1,57    | 1,37     | 3,19  |
| Flavobacterium          | 0,36     | 1,22     | 0,35    | 1,82    | 1,27     | 4,46  |
| Fluviicola              | 0,00     | 0,83     | 0,34    | 7,09    | 1,22     | 5,67  |
| Arthrobacter            | 0,00     | 0,80     | 0,32    | 1,71    | 1,16     | 6,84  |
| Unassigned              | 2,30     | 1,60     | 0,32    | 1,56    | 1,15     | 7,99  |
| Oerskovia               | 0,00     | 0,69     | 0,28    | 1,49    | 1,02     | 9,01  |
| Chryseobacterium        | 0,66     | 0,00     | 0,27    | 2,66    | 0,96     | 9,97  |
| Sphingobacterium        | 0,05     | 0,68     | 0,27    | 1,90    | 0,96     | 10,93 |
| Olivibacter             | 0,00     | 0,61     | 0,25    | 1,28    | 0,91     | 11,84 |
| Parapedobacter          | 0,00     | 0,62     | 0,25    | 1,34    | 0,91     | 12,75 |
| Dyadobacter             | 0,28     | 0,88     | 0,25    | 1,92    | 0,90     | 13,64 |
| Pseudarthrobacter       | 3,38     | 2,79     | 0,24    | 2,75    | 0,88     | 14,52 |
| Noviherbaspirillum      | 0,00     | 0,57     | 0,23    | 1,76    | 0,84     | 15,36 |
| Nitrosospira            | 0,10     | 0,65     | 0,23    | 3,58    | 0,82     | 16,18 |
| Verrucomicrobium        | 0,55     | 0,00     | 0,23    | 4,91    | 0,82     | 16,99 |
| Pontibacter             | 0,00     | 0,55     | 0,22    | 1,87    | 0,81     | 17,80 |
| Pedobacter              | 0,49     | 1,04     | 0,22    | 3,57    | 0,80     | 18,60 |
| Actinoplanes            | 0,69     | 0,24     | 0,22    | 1,57    | 0,80     | 19,40 |
| Aeromicrobium           | 0,00     | 0,53     | 0,22    | 5,02    | 0,78     | 20,18 |
| Xylophilus              | 1,03     | 0,56     | 0,20    | 1,82    | 0,73     | 20,91 |
| Cellvibrio              | 0,22     | 0,69     | 0,19    | 5,47    | 0,69     | 21,60 |
| Pseudorhodofex          | 0,73     | 0,44     | 0,19    | 1,99    | 0,69     | 22,29 |
| Rhodococcus             | 0,71     | 1,11     | 0,19    | 1,56    | 0,67     | 22,96 |
| Arcticibacter           | 0,55     | 0,11     | 0,18    | 1,56    | 0,66     | 23,62 |
| Bacillus                | 1,19     | 0,77     | 0,18    | 1,68    | 0,65     | 24,27 |
| Salinimicrobium         | 0,00     | 0,44     | 0,18    | 1,70    | 0,65     | 24,91 |
| Pseudomonas             | 1,02     | 1,30     | 0,18    | 1,99    | 0,63     | 25,55 |
| Microbacterium          | 0,21     | 0,60     | 0,17    | 1,17    | 0,63     | 26,18 |
| Edaphobaculum           | 0,20     | 0,60     | 0,17    | 1,56    | 0,63     | 26,80 |
| Pelomonas               | 0,60     | 0,44     | 0,17    | 1,24    | 0,62     | 27,43 |
| Pantoea                 | 0,54     | 0,60     | 0,17    | 1,19    | 0,60     | 28,03 |
| TM7                     | 0,41     | 0,00     | 0,17    | 3,18    | 0,60     | 28,63 |
| Devosia                 | 0,39     | 0,79     | 0,16    | 6,90    | 0,59     | 29,22 |
| Moheibacter             | 0,00     | 0,39     | 0,16    | 1,90    | 0,57     | 29,80 |
| Aliihoeflea             | 0,00     | 0,39     | 0,16    | 1,79    | 0,57     | 30,36 |

# Groups C- & PKA

Average dissimilarity = 25,74

|                          | Group C- | Group PKA |         |         |          |       |
|--------------------------|----------|-----------|---------|---------|----------|-------|
| Species                  | Av.Abund | Av.Abund  | Av.Diss | Diss/SD | Contrib% | Cum.% |
| Noviherbaspirillum       | 0,00     | 1,06      | 0,44    | 3,79    | 1,72     | 1,72  |
| Tychonema CCAP_1459-11B  | 1,25     | 0,39      | 0,40    | 1,34    | 1,56     | 3,29  |
| Massilia                 | 0,56     | 1,44      | 0,39    | 1,48    | 1,50     | 4,78  |
| Nafulsella               | 0,00     | 0,74      | 0,31    | 1,72    | 1,20     | 5,98  |
| Aeromicrobium            | 0,00     | 0,65      | 0,27    | 12,60   | 1,06     | 7,04  |
| Pontibacter              | 0,00     | 0,65      | 0,27    | 3,38    | 1,06     | 8,10  |
| Arthrobacter             | 0,00     | 0,63      | 0,26    | 1,70    | 1,02     | 9,12  |
| Fluviicola               | 0,00     | 0,62      | 0,26    | 2,31    | 1,01     | 10,13 |
| Pseudorhodoferrax        | 0,73     | 0,18      | 0,26    | 1,70    | 1,00     | 11,13 |
| Pelomonas                | 0,60     | 0,00      | 0,25    | 1,73    | 0,96     | 12,09 |
| Stenotrophomonas         | 0,57     | 0,00      | 0,24    | 4,25    | 0,93     | 13,02 |
| Arcticibacter            | 0,55     | 0,00      | 0,23    | 2,01    | 0,90     | 13,91 |
| Rhodococcus              | 0,71     | 0,18      | 0,22    | 2,08    | 0,86     | 14,77 |
| Nitrosospira             | 0,10     | 0,63      | 0,22    | 2,93    | 0,85     | 15,63 |
| Nitrobacter              | 0,00     | 0,53      | 0,22    | 12,79   | 0,85     | 16,48 |
| Unassigned               | 2,30     | 2,16      | 0,21    | 1,53    | 0,83     | 17,31 |
| IMCC26134                | 0,59     | 0,11      | 0,20    | 2,24    | 0,78     | 18,09 |
| Chryseobacterium         | 0,66     | 0,21      | 0,19    | 2,00    | 0,75     | 18,83 |
| Salinimicrobium          | 0,00     | 0,46      | 0,19    | 1,89    | 0,74     | 19,57 |
| Pontibacillus            | 0,44     | 0,00      | 0,18    | 11,10   | 0,71     | 20,28 |
| Pantoea                  | 0,54     | 0,10      | 0,18    | 1,83    | 0,71     | 20,99 |
| Pseudomonas              | 1,02     | 0,76      | 0,18    | 1,21    | 0,70     | 21,69 |
| Rhizobacter              | 1,06     | 0,67      | 0,18    | 1,11    | 0,70     | 22,39 |
| Lechevalieria            | 0,40     | 0,65      | 0,17    | 1,42    | 0,67     | 23,07 |
| SH-PL14                  | 0,00     | 0,41      | 0,17    | 6,02    | 0,67     | 23,74 |
| Actinoplanes             | 0,69     | 0,48      | 0,17    | 1,43    | 0,65     | 24,39 |
| Devosia                  | 0,39     | 0,79      | 0,16    | 7,22    | 0,64     | 25,02 |
| Opitutus                 | 1,04     | 0,96      | 0,16    | 1,78    | 0,63     | 25,65 |
| Candidatus Alysiosphaera | 0,66     | 0,31      | 0,16    | 1,35    | 0,62     | 26,28 |
| TM7a                     | 0,14     | 0,52      | 0,16    | 1,94    | 0,62     | 26,90 |
| Cellvibrio               | 0,22     | 0,60      | 0,16    | 2,33    | 0,62     | 27,52 |
| Caenimonas               | 0,67     | 0,32      | 0,16    | 1,50    | 0,61     | 28,13 |
| Rubrobacter              | 1,57     | 1,94      | 0,15    | 1,93    | 0,60     | 28,73 |
| Nocardioides             | 0,71     | 1,08      | 0,15    | 2,48    | 0,59     | 29,31 |
| Duganella                | 0,36     | 0,00      | 0,15    | 1,20    | 0,58     | 29,89 |
| Cystobacter              | 0,73     | 0,55      | 0,15    | 1,37    | 0,58     | 30,47 |

# Groups C+ & PKA

Average dissimilarity = 23,98

|                          | Group C+ | Group PKA |         |         |          |       |
|--------------------------|----------|-----------|---------|---------|----------|-------|
| Species                  | Av.Abund | Av.Abund  | Av.Diss | Diss/SD | Contrib% | Cum.% |
| Achromobacter            | 1,61     | 0,26      | 0,56    | 1,46    | 2,32     | 2,32  |
| Rhodococcus              | 1,11     | 0,18      | 0,38    | 3,50    | 1,57     | 3,90  |
| Massilia                 | 0,63     | 1,44      | 0,37    | 1,47    | 1,55     | 5,44  |
| Nafulsella               | 0,00     | 0,74      | 0,30    | 1,72    | 1,25     | 6,69  |
| Unassigned               | 1,60     | 2,16      | 0,28    | 1,62    | 1,16     | 7,86  |
| Sphingobacterium         | 0,68     | 0,00      | 0,27    | 1,80    | 1,15     | 9,00  |
| Oerskovia                | 0,69     | 0,09      | 0,26    | 1,50    | 1,09     | 10,09 |
| Parapedobacter           | 0,62     | 0,00      | 0,25    | 1,34    | 1,04     | 11,13 |
| Microbacterium           | 0,60     | 0,00      | 0,25    | 1,83    | 1,03     | 12,16 |
| Flavobacterium           | 1,22     | 0,67      | 0,23    | 1,20    | 0,95     | 13,11 |
| Noviherbaspirillum       | 0,57     | 1,06      | 0,23    | 1,55    | 0,94     | 14,05 |
| Pseudomonas              | 1,30     | 0,76      | 0,22    | 1,58    | 0,92     | 14,97 |
| Pantoea                  | 0,60     | 0,10      | 0,21    | 1,03    | 0,86     | 15,83 |
| Olivibacter              | 0,61     | 0,19      | 0,20    | 1,22    | 0,85     | 16,68 |
| Arthrobacter             | 0,80     | 0,63      | 0,20    | 1,28    | 0,83     | 17,51 |
| Stenotrophomonas         | 0,46     | 0,00      | 0,19    | 2,06    | 0,79     | 18,30 |
| Knoellia                 | 0,20     | 0,56      | 0,18    | 1,64    | 0,77     | 19,07 |
| Pelomonas                | 0,44     | 0,00      | 0,18    | 1,14    | 0,74     | 19,80 |
| Bacillus                 | 0,77     | 1,12      | 0,17    | 2,10    | 0,70     | 20,51 |
| Actinoplanes             | 0,24     | 0,48      | 0,16    | 1,65    | 0,68     | 21,18 |
| Brachybacterium          | 0,40     | 0,00      | 0,16    | 5,61    | 0,67     | 21,85 |
| Cellulomonas             | 0,17     | 0,56      | 0,16    | 1,97    | 0,67     | 22,52 |
| Acidovorax               | 0,38     | 0,00      | 0,15    | 1,06    | 0,64     | 23,16 |
| Terrabacter              | 0,15     | 0,47      | 0,15    | 1,95    | 0,64     | 23,80 |
| Pseudactinotalea         | 0,37     | 0,00      | 0,15    | 11,66   | 0,63     | 24,43 |
| Chiayiivirga             | 0,36     | 0,00      | 0,15    | 1,86    | 0,61     | 25,05 |
| Telmatocola              | 0,00     | 0,36      | 0,14    | 1,74    | 0,60     | 25,64 |
| Rubrobacter              | 1,85     | 1,94      | 0,14    | 1,54    | 0,58     | 26,22 |
| Kocuria                  | 0,34     | 0,00      | 0,14    | 1,84    | 0,57     | 26,79 |
| Dyadobacter              | 0,88     | 0,58      | 0,14    | 1,36    | 0,57     | 27,36 |
| Candidatus_Alysiosphaera | 0,44     | 0,31      | 0,13    | 1,40    | 0,56     | 27,92 |
| Isosphaera               | 0,00     | 0,33      | 0,13    | 1,07    | 0,55     | 28,47 |
| Cryptosporangium         | 0,14     | 0,39      | 0,13    | 3,22    | 0,54     | 29,01 |
| Williamsia               | 0,34     | 0,04      | 0,13    | 1,71    | 0,53     | 29,55 |
| Rufibacter               | 0,00     | 0,31      | 0,13    | 17,79   | 0,53     | 30,08 |

## Groups C- & PA

Average dissimilarity = 24,97

|                         | Group C- | Group PA |         |         |          |       |
|-------------------------|----------|----------|---------|---------|----------|-------|
| Species                 | Av.Abund | Av.Abund | Av.Diss | Diss/SD | Contrib% | Cum.% |
| Tychonema_CCAP_1459-11B | 1,25     | 0,29     | 0,41    | 1,25    | 1,64     | 1,64  |
| Phormidesmis_ANT.L52.6  | 0,07     | 0,79     | 0,32    | 1,28    | 1,27     | 2,91  |
| Acidovorax              | 0,00     | 0,76     | 0,31    | 1,55    | 1,25     | 4,16  |
| Pseudorhodoferax        | 0,73     | 0,00     | 0,30    | 1,64    | 1,19     | 5,35  |
| Fluviicola              | 0,00     | 0,71     | 0,29    | 3,15    | 1,17     | 6,53  |
| Actinoplanes            | 0,69     | 0,00     | 0,28    | 1,94    | 1,12     | 7,65  |
| Chryseobacterium        | 0,66     | 0,00     | 0,27    | 2,66    | 1,08     | 8,73  |
| Phormidium_CYN64        | 0,00     | 0,63     | 0,26    | 1,13    | 1,04     | 9,76  |
| Stenotrophomonas        | 0,57     | 0,00     | 0,24    | 4,25    | 0,95     | 10,71 |
| Arthrobacter            | 0,00     | 0,57     | 0,23    | 10,09   | 0,94     | 11,65 |
| Bacteriovorax           | 0,09     | 0,63     | 0,22    | 2,07    | 0,88     | 12,53 |
| Rhodococcus             | 0,71     | 0,18     | 0,22    | 1,99    | 0,88     | 13,41 |
| Pantoea                 | 0,54     | 0,08     | 0,19    | 1,92    | 0,75     | 14,16 |
| Nitrosospira            | 0,10     | 0,55     | 0,19    | 2,66    | 0,75     | 14,91 |
| Aeromicrobium           | 0,00     | 0,45     | 0,19    | 1,74    | 0,75     | 15,66 |
| Unassigned              | 2,30     | 2,33     | 0,19    | 1,63    | 0,74     | 16,40 |
| TM7a                    | 0,14     | 0,59     | 0,19    | 2,15    | 0,74     | 17,14 |
| Pelomonas               | 0,60     | 0,25     | 0,18    | 1,51    | 0,74     | 17,88 |
| Massilia                | 0,56     | 0,98     | 0,18    | 2,90    | 0,71     | 18,59 |
| SH-PL14                 | 0,00     | 0,42     | 0,18    | 14,60   | 0,70     | 19,29 |
| Verrucomicrobium        | 0,55     | 0,62     | 0,18    | 1,24    | 0,70     | 19,99 |
| Flavobacterium          | 0,36     | 0,78     | 0,17    | 2,81    | 0,69     | 20,69 |
| Quadrisphaera           | 0,41     | 0,00     | 0,17    | 8,72    | 0,68     | 21,37 |
| Achromobacter           | 0,45     | 0,41     | 0,17    | 1,33    | 0,68     | 22,05 |
| Pseudarthrobacter       | 3,38     | 2,98     | 0,17    | 2,62    | 0,66     | 22,71 |
| Pontibacter             | 0,00     | 0,39     | 0,16    | 1,76    | 0,64     | 23,35 |
| Solirubrobacter         | 0,72     | 0,34     | 0,16    | 1,29    | 0,63     | 23,99 |
| Ideonella               | 0,48     | 0,66     | 0,16    | 1,43    | 0,63     | 24,62 |
| Arcticibacter           | 0,55     | 0,19     | 0,15    | 1,33    | 0,61     | 25,23 |
| Bacillus                | 1,19     | 0,95     | 0,15    | 1,32    | 0,60     | 25,83 |
| Caenimonas              | 0,67     | 0,34     | 0,15    | 1,47    | 0,60     | 26,43 |
| Opitutus                | 1,04     | 1,07     | 0,15    | 1,56    | 0,59     | 27,02 |
| Longimicrobium          | 0,36     | 0,00     | 0,15    | 6,13    | 0,59     | 27,61 |
| Craurococcus-Caldovatus | 0,46     | 0,11     | 0,14    | 2,78    | 0,58     | 28,19 |
| Micromonospora          | 0,21     | 0,39     | 0,14    | 1,40    | 0,58     | 28,77 |
| Ellin6067               | 0,55     | 0,21     | 0,14    | 2,06    | 0,57     | 29,34 |
| Cellvibrio              | 0,22     | 0,47     | 0,14    | 2,39    | 0,56     | 29,90 |

|               |      |      |      |      |      |       |
|---------------|------|------|------|------|------|-------|
| Lechevalieria | 0,40 | 0,22 | 0,14 | 1,37 | 0,56 | 30,46 |
|---------------|------|------|------|------|------|-------|

### Groups C+ & PA

Average dissimilarity = 24,59

|                        | Group C+ | Group PA |         |         |          |       |
|------------------------|----------|----------|---------|---------|----------|-------|
| Species                | Av.Abund | Av.Abund | Av.Diss | Diss/SD | Contrib% | Cum.% |
| Achromobacter          | 1,61     | 0,41     | 0,51    | 1,37    | 2,08     | 2,08  |
| Rhodococcus            | 1,11     | 0,18     | 0,37    | 3,21    | 1,52     | 3,60  |
| Phormidesmis ANT.L52.6 | 0,00     | 0,79     | 0,31    | 1,18    | 1,27     | 4,87  |
| Unassigned             | 1,60     | 2,33     | 0,30    | 1,57    | 1,23     | 6,10  |
| Oerskovia              | 0,69     | 0,00     | 0,28    | 1,49    | 1,13     | 7,23  |
| Sphingobacterium       | 0,68     | 0,07     | 0,26    | 1,93    | 1,04     | 8,27  |
| Phormidium CYN64       | 0,00     | 0,63     | 0,25    | 1,13    | 1,02     | 9,29  |
| Olivibacter            | 0,61     | 0,00     | 0,25    | 1,28    | 1,01     | 10,30 |
| Verrucomicrobium       | 0,00     | 0,62     | 0,25    | 1,15    | 1,01     | 11,30 |
| Parapedobacter         | 0,62     | 0,00     | 0,25    | 1,34    | 1,01     | 12,31 |
| Microbacterium         | 0,60     | 0,00     | 0,25    | 1,83    | 1,00     | 13,30 |
| Acidovorax             | 0,38     | 0,76     | 0,24    | 1,52    | 0,96     | 14,27 |
| Noviherbaspirillum     | 0,57     | 0,00     | 0,23    | 1,76    | 0,93     | 15,20 |
| Pantoea                | 0,60     | 0,08     | 0,21    | 1,07    | 0,86     | 16,06 |
| Ideonella              | 0,25     | 0,66     | 0,20    | 1,39    | 0,83     | 16,89 |
| Flavobacterium         | 1,22     | 0,78     | 0,19    | 1,06    | 0,77     | 17,66 |
| Bacteriovorax          | 0,18     | 0,63     | 0,19    | 1,95    | 0,77     | 18,44 |
| Stenotrophomonas       | 0,46     | 0,00     | 0,19    | 2,06    | 0,76     | 19,20 |
| Arthrobacter           | 0,80     | 0,57     | 0,18    | 1,89    | 0,74     | 19,94 |
| Lechevalieria          | 0,63     | 0,22     | 0,18    | 1,70    | 0,73     | 20,67 |
| Pseudorhodoferrax      | 0,44     | 0,00     | 0,18    | 8,27    | 0,73     | 21,40 |
| Salinimicrobium        | 0,44     | 0,00     | 0,18    | 1,70    | 0,72     | 22,11 |
| Brachybacterium        | 0,40     | 0,00     | 0,16    | 5,61    | 0,65     | 22,76 |
| Pelomonas              | 0,44     | 0,25     | 0,16    | 1,40    | 0,64     | 23,40 |
| Pseudactinotalea       | 0,37     | 0,00     | 0,15    | 11,67   | 0,61     | 24,01 |
| Quadrifera             | 0,37     | 0,00     | 0,15    | 1,69    | 0,60     | 24,61 |
| Chiayiivirga           | 0,36     | 0,00     | 0,15    | 1,86    | 0,59     | 25,20 |
| Massilia               | 0,63     | 0,98     | 0,15    | 1,06    | 0,59     | 25,79 |
| Dyadobacter            | 0,88     | 0,54     | 0,14    | 1,37    | 0,58     | 26,37 |
| TM7                    | 0,00     | 0,35     | 0,14    | 13,89   | 0,57     | 26,95 |
| TX1A-55                | 0,00     | 0,35     | 0,14    | 10,03   | 0,57     | 27,52 |
| Micromonospora         | 0,21     | 0,39     | 0,14    | 1,39    | 0,57     | 28,09 |
| Kocuria                | 0,34     | 0,00     | 0,14    | 1,84    | 0,55     | 28,65 |
| Bacillus               | 0,77     | 0,95     | 0,13    | 1,91    | 0,53     | 29,18 |
| Pontibacter            | 0,55     | 0,39     | 0,13    | 1,35    | 0,52     | 29,70 |

|               |      |      |      |      |      |       |
|---------------|------|------|------|------|------|-------|
| Adhaeribacter | 0,72 | 1,04 | 0,13 | 2,97 | 0,52 | 30,22 |
|---------------|------|------|------|------|------|-------|

### Groups PKA & PA

Average dissimilarity = 21,57

|                          | Group PKA | Group PA |         |         |          |       |
|--------------------------|-----------|----------|---------|---------|----------|-------|
| Species                  | Av.Abund  | Av.Abund | Av.Diss | Diss/SD | Contrib% | Cum.% |
| Noviherbaspirillum       | 1,06      | 0,00     | 0,44    | 3,80    | 2,02     | 2,02  |
| Phormidesmis ANT.L52.6   | 0,00      | 0,79     | 0,32    | 1,18    | 1,48     | 3,50  |
| Acidovorax               | 0,00      | 0,76     | 0,31    | 1,55    | 1,44     | 4,94  |
| Nafulsella               | 0,74      | 0,07     | 0,29    | 1,81    | 1,33     | 6,27  |
| Massilia                 | 1,44      | 0,98     | 0,28    | 1,53    | 1,30     | 7,57  |
| Phormidium CYN64         | 0,00      | 0,63     | 0,26    | 1,13    | 1,19     | 8,76  |
| Ideonella                | 0,14      | 0,66     | 0,24    | 1,56    | 1,09     | 9,85  |
| Bacteriovorax            | 0,08      | 0,63     | 0,22    | 2,13    | 1,03     | 10,88 |
| Lechevalieria            | 0,65      | 0,22     | 0,21    | 1,65    | 0,97     | 11,86 |
| Verrucomicrobium         | 0,21      | 0,62     | 0,21    | 1,11    | 0,96     | 12,82 |
| Actinoplanes             | 0,48      | 0,00     | 0,20    | 1,86    | 0,91     | 13,73 |
| Salinimicrobium          | 0,46      | 0,00     | 0,19    | 1,89    | 0,87     | 14,60 |
| Quadrisphaera            | 0,42      | 0,00     | 0,17    | 6,53    | 0,80     | 15,40 |
| Unassigned               | 2,16      | 2,33     | 0,16    | 1,14    | 0,76     | 16,16 |
| Micromonospora           | 0,00      | 0,39     | 0,16    | 1,38    | 0,73     | 16,89 |
| Knoellia                 | 0,56      | 0,37     | 0,15    | 1,56    | 0,71     | 17,60 |
| Achromobacter            | 0,26      | 0,41     | 0,15    | 1,44    | 0,70     | 18,31 |
| Pseudomonas              | 0,76      | 1,05     | 0,15    | 1,28    | 0,67     | 18,98 |
| Telmatocola              | 0,36      | 0,00     | 0,14    | 1,74    | 0,67     | 19,65 |
| TX1A-55                  | 0,00      | 0,35     | 0,14    | 10,10   | 0,67     | 20,32 |
| Luteitalea               | 0,00      | 0,34     | 0,14    | 10,47   | 0,64     | 20,96 |
| Candidatus Alysiosphaera | 0,31      | 0,37     | 0,14    | 1,28    | 0,63     | 21,59 |
| Solirubrobacter          | 0,47      | 0,34     | 0,13    | 1,23    | 0,63     | 22,21 |
| Isosphaera               | 0,33      | 0,00     | 0,13    | 1,07    | 0,62     | 22,84 |
| Bacillus                 | 1,12      | 0,95     | 0,13    | 1,13    | 0,62     | 23,46 |
| Pontibacter              | 0,65      | 0,39     | 0,13    | 1,43    | 0,61     | 24,07 |
| Chitinophaga             | 0,58      | 0,88     | 0,13    | 1,68    | 0,61     | 24,68 |
| Kribbella                | 0,39      | 0,55     | 0,13    | 1,38    | 0,61     | 25,29 |
| Pontibacillus            | 0,00      | 0,32     | 0,13    | 7,86    | 0,60     | 25,89 |
| Rhizobacter              | 0,67      | 0,95     | 0,13    | 1,10    | 0,60     | 26,49 |
| Candidatus Solibacter    | 0,00      | 0,31     | 0,13    | 1,92    | 0,59     | 27,08 |
| Arthrobacter             | 0,63      | 0,57     | 0,13    | 1,34    | 0,58     | 27,66 |
| Terrabacter              | 0,47      | 0,27     | 0,12    | 1,77    | 0,58     | 28,24 |
| Nitrobacter              | 0,53      | 0,23     | 0,12    | 1,46    | 0,57     | 28,81 |
| Dactylosporangium        | 0,45      | 0,70     | 0,12    | 1,01    | 0,57     | 29,38 |

|                          |      |      |      |      |      |       |
|--------------------------|------|------|------|------|------|-------|
| Fluviicola               | 0,62 | 0,71 | 0,12 | 1,45 | 0,56 | 29,95 |
| Candidatus Entotheonella | 0,62 | 0,34 | 0,12 | 1,17 | 0,54 | 30,49 |

### Groups C- & PD

Average dissimilarity = 26,12

|                         | Group C- | Group PD |         |         |          |       |
|-------------------------|----------|----------|---------|---------|----------|-------|
| Species                 | Av.Abund | Av.Abund | Av.Diss | Diss/SD | Contrib% | Cum.% |
| Arthrobacter            | 0,00     | 1,03     | 0,42    | 1,73    | 1,61     | 1,61  |
| Tychonema CCAP 1459-11B | 1,25     | 0,68     | 0,37    | 1,78    | 1,40     | 3,01  |
| Kocuria                 | 0,00     | 0,88     | 0,36    | 1,79    | 1,36     | 4,37  |
| Fluviicola              | 0,00     | 0,67     | 0,27    | 4,02    | 1,05     | 5,42  |
| Sanguibacter            | 0,00     | 0,62     | 0,25    | 1,68    | 0,97     | 6,39  |
| Nitrosospira            | 0,10     | 0,71     | 0,25    | 3,63    | 0,95     | 7,34  |
| Chryseobacterium        | 0,66     | 0,05     | 0,25    | 2,38    | 0,95     | 8,29  |
| Streptosporangium       | 0,30     | 0,83     | 0,24    | 1,29    | 0,93     | 9,22  |
| Pelomonas               | 0,60     | 0,00     | 0,24    | 1,73    | 0,92     | 10,14 |
| Unassigned              | 2,30     | 1,80     | 0,24    | 1,51    | 0,91     | 11,05 |
| Stenotrophomonas        | 0,57     | 0,00     | 0,23    | 4,25    | 0,89     | 11,94 |
| Pontibacter             | 0,00     | 0,55     | 0,22    | 1,60    | 0,85     | 12,79 |
| Nitrobacter             | 0,00     | 0,54     | 0,22    | 8,65    | 0,84     | 13,63 |
| Pseudorhodoferrax       | 0,73     | 0,38     | 0,21    | 1,73    | 0,81     | 14,44 |
| Bacillus                | 1,19     | 0,80     | 0,21    | 1,49    | 0,79     | 15,23 |
| Cellvibrio              | 0,22     | 0,71     | 0,20    | 4,88    | 0,77     | 16,00 |
| Achromobacter           | 0,45     | 0,75     | 0,19    | 1,47    | 0,74     | 16,74 |
| Brachybacterium         | 0,16     | 0,56     | 0,19    | 1,88    | 0,72     | 17,46 |
| Williamsia              | 0,00     | 0,46     | 0,19    | 4,24    | 0,72     | 18,18 |
| Olivibacter             | 0,00     | 0,45     | 0,18    | 7,26    | 0,70     | 18,88 |
| Noviherbaspirillum      | 0,00     | 0,45     | 0,18    | 1,81    | 0,70     | 19,58 |
| Aeromicrobium           | 0,00     | 0,43     | 0,17    | 1,93    | 0,66     | 20,24 |
| Virgibacillus           | 0,00     | 0,42     | 0,17    | 2,53    | 0,66     | 20,91 |
| Opitutus                | 1,04     | 0,84     | 0,17    | 1,84    | 0,66     | 21,56 |
| Pantoea                 | 0,54     | 0,13     | 0,17    | 1,67    | 0,64     | 22,20 |
| Cystobacter             | 0,73     | 0,53     | 0,16    | 1,41    | 0,62     | 22,82 |
| IMCC26134               | 0,59     | 0,19     | 0,16    | 1,92    | 0,61     | 23,43 |
| Xylophilus              | 1,03     | 0,64     | 0,16    | 1,79    | 0,61     | 24,04 |
| Pseudarthrobacter       | 3,38     | 3,00     | 0,16    | 2,64    | 0,59     | 24,63 |
| Ellin6055               | 1,25     | 0,89     | 0,15    | 1,96    | 0,58     | 25,22 |
| Flavobacterium          | 0,36     | 0,73     | 0,15    | 2,43    | 0,58     | 25,80 |
| Rubrobacter             | 1,57     | 1,94     | 0,15    | 2,12    | 0,57     | 26,37 |
| Arcticibacter           | 0,55     | 0,21     | 0,15    | 1,33    | 0,57     | 26,94 |
| Psychrobacillus         | 0,00     | 0,37     | 0,15    | 6,74    | 0,57     | 27,51 |



|                          |      |      |      |      |      |       |
|--------------------------|------|------|------|------|------|-------|
| Knoellia                 | 0,46 | 0,82 | 0,15 | 1,50 | 0,57 | 28,08 |
| Candidatus Alysiosphaera | 0,66 | 0,33 | 0,15 | 1,23 | 0,57 | 28,65 |
| Duganella                | 0,36 | 0,00 | 0,15 | 1,20 | 0,56 | 29,20 |
| Longimicrobium           | 0,36 | 0,00 | 0,14 | 6,13 | 0,55 | 29,76 |
| Pseudomonas              | 1,02 | 1,17 | 0,14 | 1,69 | 0,55 | 30,30 |

### Groups C+ & PD

Average dissimilarity = 23,18

|                    | Group C+ | Group PD |         |         |          |       |
|--------------------|----------|----------|---------|---------|----------|-------|
| Species            | Av.Abund | Av.Abund | Av.Diss | Diss/SD | Contrib% | Cum.% |
| Achromobacter      | 1,61     | 0,75     | 0,40    | 1,24    | 1,74     | 1,74  |
| Streptosporangium  | 0,13     | 0,83     | 0,28    | 1,33    | 1,20     | 2,94  |
| Oerskovia          | 0,69     | 0,00     | 0,27    | 1,49    | 1,18     | 4,12  |
| Kocuria            | 0,34     | 0,88     | 0,27    | 2,07    | 1,15     | 5,27  |
| Arthrobacter       | 0,80     | 1,03     | 0,25    | 1,29    | 1,07     | 6,33  |
| Sanguibacter       | 0,00     | 0,62     | 0,25    | 1,68    | 1,07     | 7,40  |
| Knoellia           | 0,20     | 0,82     | 0,25    | 2,82    | 1,06     | 8,46  |
| Parapedobacter     | 0,62     | 0,00     | 0,24    | 1,34    | 1,05     | 9,51  |
| Rhodococcus        | 1,11     | 0,54     | 0,23    | 2,43    | 0,97     | 10,48 |
| Actinoplanes       | 0,24     | 0,77     | 0,22    | 1,96    | 0,96     | 11,44 |
| Sphingobacterium   | 0,68     | 0,23     | 0,22    | 2,51    | 0,93     | 12,37 |
| Flavobacterium     | 1,22     | 0,73     | 0,20    | 1,09    | 0,87     | 13,24 |
| Pantoea            | 0,60     | 0,13     | 0,19    | 0,97    | 0,83     | 14,06 |
| Stenotrophomonas   | 0,46     | 0,00     | 0,18    | 2,06    | 0,80     | 14,86 |
| Cellulomonas       | 0,17     | 0,62     | 0,18    | 2,11    | 0,78     | 15,63 |
| Pelomonas          | 0,44     | 0,00     | 0,17    | 1,14    | 0,74     | 16,38 |
| Verrucomicrobium   | 0,00     | 0,41     | 0,16    | 1,64    | 0,70     | 17,08 |
| Olivibacter        | 0,61     | 0,45     | 0,16    | 1,35    | 0,69     | 17,77 |
| Unassigned         | 1,60     | 1,80     | 0,16    | 1,35    | 0,68     | 18,45 |
| Dyadobacter        | 0,88     | 0,52     | 0,15    | 1,43    | 0,64     | 19,09 |
| Psychrobacillus    | 0,00     | 0,37     | 0,14    | 6,75    | 0,62     | 19,71 |
| Chiayiivirga       | 0,36     | 0,00     | 0,14    | 1,86    | 0,62     | 20,33 |
| Cryptosporangium   | 0,14     | 0,44     | 0,14    | 2,33    | 0,61     | 20,95 |
| Bacillus           | 0,77     | 0,80     | 0,14    | 1,80    | 0,61     | 21,56 |
| Methylibium        | 0,44     | 0,15     | 0,14    | 1,84    | 0,60     | 22,15 |
| Acidovorax         | 0,38     | 0,17     | 0,14    | 1,29    | 0,59     | 22,75 |
| Micromonospora     | 0,21     | 0,33     | 0,14    | 1,21    | 0,58     | 23,33 |
| Noviherbaspirillum | 0,57     | 0,45     | 0,14    | 1,33    | 0,58     | 23,91 |
| Microbacterium     | 0,60     | 0,28     | 0,14    | 0,97    | 0,58     | 24,50 |
| Pontibacter        | 0,55     | 0,55     | 0,13    | 1,16    | 0,58     | 25,08 |
| Rubrobacter        | 1,85     | 1,94     | 0,13    | 1,58    | 0,58     | 25,66 |

|                          |      |      |      |      |      |       |
|--------------------------|------|------|------|------|------|-------|
| Candidatus Alysiosphaera | 0,44 | 0,33 | 0,13 | 1,42 | 0,56 | 26,22 |
| Brachybacterium          | 0,40 | 0,56 | 0,13 | 2,04 | 0,55 | 26,77 |
| Salinimicrobium          | 0,44 | 0,20 | 0,13 | 1,62 | 0,54 | 27,31 |
| Virgisporangium          | 0,41 | 0,72 | 0,12 | 1,26 | 0,53 | 27,84 |
| Phytohabitans            | 0,00 | 0,31 | 0,12 | 0,92 | 0,53 | 28,36 |
| Phyllobacterium          | 0,50 | 0,20 | 0,12 | 1,48 | 0,52 | 28,89 |
| Archangium               | 0,86 | 1,16 | 0,12 | 1,70 | 0,52 | 29,41 |
| Terrabacter              | 0,15 | 0,39 | 0,12 | 1,74 | 0,52 | 29,93 |
| Tychonema_CCAP_1459-11B  | 0,56 | 0,68 | 0,12 | 1,48 | 0,50 | 30,43 |

### Groups PKA & PD

Average dissimilarity = 20,98

|                          | Group PKA | Group PD |         |         |          |       |
|--------------------------|-----------|----------|---------|---------|----------|-------|
| Species                  | Av.Abund  | Av.Abund | Av.Diss | Diss/SD | Contrib% | Cum.% |
| Kocuria                  | 0,00      | 0,88     | 0,35    | 1,79    | 1,68     | 1,68  |
| Massilia                 | 1,44      | 0,69     | 0,34    | 1,44    | 1,62     | 3,30  |
| Nafulsella               | 0,74      | 0,00     | 0,30    | 1,72    | 1,42     | 4,72  |
| Arthrobacter             | 0,63      | 1,03     | 0,27    | 1,47    | 1,28     | 6,00  |
| Noviherbaspirillum       | 1,06      | 0,45     | 0,25    | 1,82    | 1,21     | 7,22  |
| Streptosporangium        | 0,30      | 0,83     | 0,25    | 1,34    | 1,17     | 8,39  |
| Sanguibacter             | 0,10      | 0,62     | 0,23    | 1,76    | 1,09     | 9,49  |
| Brachybacterium          | 0,00      | 0,56     | 0,23    | 1,75    | 1,07     | 10,56 |
| Achromobacter            | 0,26      | 0,75     | 0,22    | 1,74    | 1,05     | 11,61 |
| Unassigned               | 2,16      | 1,80     | 0,22    | 2,53    | 1,03     | 12,64 |
| Bacillus                 | 1,12      | 0,80     | 0,18    | 1,30    | 0,88     | 13,52 |
| Williamsia               | 0,04      | 0,46     | 0,17    | 3,16    | 0,82     | 14,34 |
| Pseudomonas              | 0,76      | 1,17     | 0,17    | 1,29    | 0,81     | 15,15 |
| Rhizobacter              | 0,67      | 1,01     | 0,15    | 1,18    | 0,71     | 15,86 |
| Psychrobacillus          | 0,00      | 0,37     | 0,15    | 6,76    | 0,70     | 16,56 |
| Rhodococcus              | 0,18      | 0,54     | 0,15    | 2,71    | 0,70     | 17,26 |
| Tychonema_CCAP_1459-11B  | 0,39      | 0,68     | 0,14    | 1,74    | 0,67     | 17,93 |
| Salinimicrobium          | 0,46      | 0,20     | 0,14    | 2,04    | 0,65     | 18,58 |
| Cystobacter              | 0,55      | 0,53     | 0,14    | 1,17    | 0,65     | 19,23 |
| Candidatus Alysiosphaera | 0,31      | 0,33     | 0,13    | 1,19    | 0,64     | 19,87 |
| Micromonospora           | 0,00      | 0,33     | 0,13    | 1,02    | 0,64     | 20,51 |
| Isosphaera               | 0,33      | 0,00     | 0,13    | 1,07    | 0,63     | 21,14 |
| Pontibacter              | 0,65      | 0,55     | 0,13    | 1,24    | 0,61     | 21,75 |
| Dactylosporangium        | 0,45      | 0,70     | 0,13    | 1,08    | 0,60     | 22,35 |
| Actinoplanes             | 0,48      | 0,77     | 0,13    | 1,12    | 0,60     | 22,95 |
| Phytohabitans            | 0,00      | 0,31     | 0,12    | 0,92    | 0,59     | 23,55 |
| Knoellia                 | 0,56      | 0,82     | 0,12    | 0,91    | 0,57     | 24,12 |

|                    |      |      |      |      |      |       |
|--------------------|------|------|------|------|------|-------|
| Nakamurella        | 0,00 | 0,29 | 0,12 | 1,94 | 0,56 | 24,68 |
| Verrucomicrobium   | 0,21 | 0,41 | 0,12 | 1,57 | 0,55 | 25,23 |
| TM7a               | 0,52 | 0,33 | 0,11 | 1,21 | 0,53 | 25,76 |
| Microbacterium     | 0,00 | 0,28 | 0,11 | 1,89 | 0,53 | 26,29 |
| possible genus 04  | 0,43 | 0,34 | 0,11 | 1,29 | 0,53 | 26,82 |
| Pseudorhodoferrax  | 0,18 | 0,38 | 0,11 | 1,46 | 0,53 | 27,34 |
| Solirubrobacter    | 0,47 | 0,64 | 0,11 | 1,13 | 0,52 | 27,87 |
| Ellin517           | 0,60 | 0,37 | 0,11 | 1,41 | 0,52 | 28,39 |
| Lechevalieria      | 0,65 | 0,67 | 0,11 | 1,11 | 0,51 | 28,90 |
| Altererythrobacter | 0,15 | 0,42 | 0,11 | 1,78 | 0,51 | 29,41 |
| Olivibacter        | 0,19 | 0,45 | 0,11 | 2,05 | 0,50 | 29,91 |
| Fluviicola         | 0,62 | 0,67 | 0,10 | 1,43 | 0,49 | 30,41 |
|                    |      |      |      |      |      |       |

### Groups PA & PD

Average dissimilarity = 23,37

|                         | Group PA | Group PD |         |         |          |        |
|-------------------------|----------|----------|---------|---------|----------|--------|
| Species                 | Av.Abund | Av.Abund | Av.Diss | Diss/SD | Contrib% | Cum. % |
| Kocuria                 | 0,00     | 0,88     | 0,35    | 1,79    | 1,50     | 1,50   |
| Actinoplanes            | 0,00     | 0,77     | 0,31    | 5,60    | 1,32     | 2,82   |
| Phormidesmis ANT.L52.6  | 0,79     | 0,12     | 0,30    | 1,38    | 1,30     | 4,11   |
| Arthrobacter            | 0,57     | 1,03     | 0,28    | 2,52    | 1,19     | 5,30   |
| Acidovorax              | 0,76     | 0,17     | 0,26    | 1,58    | 1,12     | 6,42   |
| Streptosporangium       | 0,21     | 0,83     | 0,25    | 1,22    | 1,08     | 7,50   |
| Phormidium CYN64        | 0,63     | 0,00     | 0,25    | 1,13    | 1,07     | 8,57   |
| Sanguibacter            | 0,00     | 0,62     | 0,25    | 1,68    | 1,07     | 9,64   |
| Brachybacterium         | 0,00     | 0,56     | 0,22    | 1,75    | 0,95     | 10,60  |
| Unassigned              | 2,33     | 1,80     | 0,22    | 1,56    | 0,93     | 11,52  |
| Bacteriovorax           | 0,63     | 0,10     | 0,21    | 2,07    | 0,91     | 12,43  |
| Achromobacter           | 0,41     | 0,75     | 0,20    | 1,43    | 0,87     | 13,30  |
| Ideonella               | 0,66     | 0,26     | 0,20    | 1,54    | 0,86     | 14,16  |
| Verrucomicrobium        | 0,62     | 0,41     | 0,19    | 1,12    | 0,80     | 14,95  |
| Quadrisphaera           | 0,00     | 0,47     | 0,19    | 7,99    | 0,80     | 15,75  |
| Lechevalieria           | 0,22     | 0,67     | 0,18    | 1,77    | 0,78     | 16,53  |
| Knoellia                | 0,37     | 0,82     | 0,18    | 1,99    | 0,78     | 17,31  |
| Olivibacter             | 0,00     | 0,45     | 0,18    | 7,28    | 0,77     | 18,08  |
| Noviherbaspirillum      | 0,00     | 0,45     | 0,18    | 1,81    | 0,77     | 18,84  |
| Bacillus                | 0,95     | 0,80     | 0,17    | 1,36    | 0,71     | 19,55  |
| Tychonema CCAP 1459-11B | 0,29     | 0,68     | 0,16    | 1,69    | 0,69     | 20,24  |
| Pseudorhodoferrax       | 0,00     | 0,38     | 0,15    | 1,76    | 0,64     | 20,89  |
| Psychrobacillus         | 0,00     | 0,37     | 0,15    | 6,77    | 0,63     | 21,51  |

|                          |      |      |      |       |      |       |
|--------------------------|------|------|------|-------|------|-------|
| Rhodococcus              | 0,18 | 0,54 | 0,14 | 2,21  | 0,62 | 22,13 |
| TX1A-55                  | 0,35 | 0,00 | 0,14 | 10,13 | 0,60 | 22,73 |
| Micromonospora           | 0,39 | 0,33 | 0,14 | 1,44  | 0,60 | 23,33 |
| Williamsia               | 0,12 | 0,46 | 0,14 | 2,31  | 0,60 | 23,93 |
| Pontibacter              | 0,39 | 0,55 | 0,14 | 1,38  | 0,60 | 24,52 |
| Kribbella                | 0,55 | 0,34 | 0,14 | 1,26  | 0,59 | 25,12 |
| Solirubrobacter          | 0,34 | 0,64 | 0,13 | 1,14  | 0,57 | 25,69 |
| Candidatus Alysiosphaera | 0,37 | 0,33 | 0,13 | 1,23  | 0,56 | 26,25 |
| Cellulomonas             | 0,30 | 0,62 | 0,13 | 1,61  | 0,55 | 26,80 |
| Ellin517                 | 0,68 | 0,37 | 0,13 | 1,51  | 0,54 | 27,34 |
| Nitrobacter              | 0,23 | 0,54 | 0,12 | 1,48  | 0,53 | 27,88 |
| Candidatus Solibacter    | 0,31 | 0,00 | 0,12 | 1,93  | 0,53 | 28,41 |
| Phytohabitans            | 0,00 | 0,31 | 0,12 | 0,92  | 0,53 | 28,94 |
| Aquabacterium            | 0,31 | 0,00 | 0,12 | 1,82  | 0,53 | 29,46 |
| TM7a                     | 0,59 | 0,33 | 0,12 | 1,18  | 0,52 | 29,99 |
| Pseudoxanthomonas        | 1,20 | 0,91 | 0,12 | 1,23  | 0,52 | 30,51 |

#### Groups C- & ST

Average dissimilarity = 27,04

|                         | Group C- | Group ST |         |         |          |       |
|-------------------------|----------|----------|---------|---------|----------|-------|
| Species                 | Av.Abund | Av.Abund | Av.Diss | Diss/SD | Contrib% | Cum.% |
| Arthrobacter            | 0,00     | 1,35     | 0,56    | 1,52    | 2,05     | 2,05  |
| Tychonema CCAP_1459-11B | 1,25     | 0,42     | 0,40    | 1,38    | 1,47     | 3,52  |
| Virgibacillus           | 0,00     | 0,79     | 0,32    | 1,18    | 1,19     | 4,72  |
| Bdellovibrio            | 0,00     | 0,75     | 0,31    | 2,39    | 1,16     | 5,88  |
| Flavobacterium          | 0,36     | 1,11     | 0,31    | 1,71    | 1,16     | 7,04  |
| Fluviicola              | 0,00     | 0,74     | 0,31    | 4,42    | 1,14     | 8,18  |
| Pseudorhodoferrax       | 0,73     | 0,00     | 0,30    | 1,64    | 1,11     | 9,29  |
| TM7a                    | 0,14     | 0,82     | 0,28    | 1,48    | 1,05     | 10,34 |
| Unassigned              | 2,30     | 1,74     | 0,26    | 1,51    | 0,98     | 11,31 |
| Aeromicrobium           | 0,00     | 0,62     | 0,26    | 15,16   | 0,96     | 12,28 |
| Pontibacter             | 0,00     | 0,62     | 0,26    | 3,79    | 0,95     | 13,23 |
| Pseudarthrobacter       | 3,38     | 2,77     | 0,26    | 3,25    | 0,94     | 14,18 |
| Kocuria                 | 0,00     | 0,58     | 0,24    | 1,08    | 0,88     | 15,05 |
| Arcticibacter           | 0,55     | 0,00     | 0,23    | 2,01    | 0,85     | 15,90 |
| Cellvibrio              | 0,22     | 0,76     | 0,23    | 4,47    | 0,84     | 16,74 |
| Roseisolibacter         | 0,53     | 0,00     | 0,22    | 13,22   | 0,81     | 17,55 |
| Nitrospira              | 0,10     | 0,60     | 0,21    | 3,18    | 0,78     | 18,33 |
| Achromobacter           | 0,45     | 0,73     | 0,21    | 1,53    | 0,77     | 19,10 |
| Rubrobacter             | 1,57     | 2,08     | 0,21    | 2,03    | 0,77     | 19,87 |
| Bacteriovorax           | 0,09     | 0,55     | 0,19    | 2,31    | 0,71     | 20,58 |

|                  |      |      |      |      |      |       |
|------------------|------|------|------|------|------|-------|
| Chryseobacterium | 0,66 | 0,24 | 0,19 | 1,99 | 0,69 | 21,27 |
| Pelomonas        | 0,60 | 0,25 | 0,19 | 1,54 | 0,69 | 21,96 |
| Allostreptomyces | 0,00 | 0,43 | 0,18 | 1,95 | 0,66 | 22,62 |
| Glycomyces       | 0,00 | 0,43 | 0,18 | 1,76 | 0,66 | 23,28 |
| Verrucomicrobium | 0,55 | 0,14 | 0,17 | 2,50 | 0,65 | 23,93 |
| Streptomyces     | 0,77 | 1,17 | 0,17 | 1,03 | 0,65 | 24,57 |
| Pseudomonas      | 1,02 | 1,15 | 0,17 | 1,68 | 0,63 | 25,20 |
| Microvirga       | 2,03 | 1,80 | 0,17 | 1,04 | 0,61 | 25,81 |
| Bacillus         | 1,19 | 0,95 | 0,17 | 1,47 | 0,61 | 26,42 |
| Rhodococcus      | 0,71 | 0,36 | 0,16 | 2,21 | 0,60 | 27,02 |
| Opitutus         | 1,04 | 0,99 | 0,16 | 1,68 | 0,58 | 27,60 |
| Lechevalieria    | 0,40 | 0,59 | 0,16 | 1,33 | 0,58 | 28,18 |
| SH-PL14          | 0,00 | 0,38 | 0,15 | 1,94 | 0,57 | 28,75 |
| Actinoplanes     | 0,69 | 0,58 | 0,15 | 1,08 | 0,57 | 29,32 |
| IMCC26134        | 0,59 | 0,23 | 0,15 | 1,68 | 0,57 | 29,88 |
| Duganella        | 0,36 | 0,00 | 0,15 | 1,20 | 0,55 | 30,43 |

#### Groups C+ & ST

Average dissimilarity = 24,69

|                    | Group C+ | Group ST |         |         |          |       |
|--------------------|----------|----------|---------|---------|----------|-------|
| Species            | Av.Abund | Av.Abund | Av.Diss | Diss/SD | Contrib% | Cum.% |
| Achromobacter      | 1,61     | 0,73     | 0,43    | 1,27    | 1,73     | 1,73  |
| Arthrobacter       | 0,80     | 1,35     | 0,40    | 1,67    | 1,60     | 3,34  |
| Rhodococcus        | 1,11     | 0,36     | 0,31    | 3,16    | 1,24     | 4,57  |
| Virgibacillus      | 0,33     | 0,79     | 0,29    | 1,82    | 1,17     | 5,75  |
| Oerskovia          | 0,69     | 0,00     | 0,28    | 1,49    | 1,13     | 6,88  |
| Sphingobacterium   | 0,68     | 0,00     | 0,27    | 1,80    | 1,11     | 7,99  |
| Parapedobacter     | 0,62     | 0,00     | 0,25    | 1,34    | 1,01     | 8,99  |
| Microbacterium     | 0,60     | 0,00     | 0,25    | 1,83    | 1,00     | 9,99  |
| Noviherbaspirillum | 0,57     | 0,00     | 0,23    | 1,76    | 0,93     | 10,93 |
| Flavobacterium     | 1,22     | 1,11     | 0,22    | 1,49    | 0,90     | 11,82 |
| Kocuria            | 0,34     | 0,58     | 0,21    | 1,55    | 0,83     | 12,66 |
| Bdellovibrio       | 0,27     | 0,75     | 0,20    | 1,66    | 0,82     | 13,47 |
| Actinoplanes       | 0,24     | 0,58     | 0,19    | 1,46    | 0,77     | 14,24 |
| Olivibacter        | 0,61     | 0,26     | 0,19    | 1,14    | 0,76     | 15,00 |
| Pseudorhodoferrax  | 0,44     | 0,00     | 0,18    | 8,27    | 0,73     | 15,73 |
| Pantoea            | 0,60     | 0,30     | 0,18    | 1,02    | 0,71     | 16,44 |
| Allostreptomyces   | 0,00     | 0,43     | 0,17    | 1,95    | 0,71     | 17,15 |
| TM7a               | 0,49     | 0,82     | 0,17    | 1,30    | 0,71     | 17,85 |
| Rubrobacter        | 1,85     | 2,08     | 0,16    | 1,52    | 0,66     | 18,51 |
| Unassigned         | 1,60     | 1,74     | 0,16    | 1,34    | 0,65     | 19,16 |

|                          |      |      |      |       |      |       |
|--------------------------|------|------|------|-------|------|-------|
| Brachybacterium          | 0,40 | 0,00 | 0,16 | 5,61  | 0,65 | 19,81 |
| Pelomonas                | 0,44 | 0,25 | 0,16 | 1,43  | 0,64 | 20,45 |
| Bacteriovorax            | 0,18 | 0,55 | 0,15 | 1,73  | 0,63 | 21,08 |
| Dyadobacter              | 0,88 | 0,51 | 0,15 | 1,45  | 0,62 | 21,71 |
| Knoellia                 | 0,20 | 0,48 | 0,15 | 1,37  | 0,62 | 22,33 |
| Streptomyces             | 1,09 | 1,17 | 0,15 | 1,24  | 0,62 | 22,94 |
| Pseudactinotalea         | 0,37 | 0,00 | 0,15 | 11,66 | 0,61 | 23,56 |
| Nonomuraea               | 0,44 | 0,81 | 0,15 | 1,57  | 0,61 | 24,16 |
| Chiayiivirga             | 0,36 | 0,00 | 0,15 | 1,86  | 0,59 | 24,76 |
| TM7                      | 0,00 | 0,36 | 0,14 | 1,70  | 0,59 | 25,34 |
| Microvirga               | 1,89 | 1,80 | 0,14 | 1,06  | 0,58 | 25,93 |
| possible genus 04        | 0,32 | 0,67 | 0,14 | 1,90  | 0,57 | 26,50 |
| Acidovorax               | 0,38 | 0,20 | 0,14 | 1,31  | 0,56 | 27,06 |
| Williamsia               | 0,34 | 0,00 | 0,14 | 1,75  | 0,56 | 27,61 |
| Terrabacter              | 0,15 | 0,48 | 0,13 | 2,07  | 0,54 | 28,15 |
| Micromonospora           | 0,21 | 0,33 | 0,13 | 1,37  | 0,53 | 28,69 |
| Roseisolibacter          | 0,32 | 0,00 | 0,13 | 1,16  | 0,52 | 29,21 |
| Candidatus Alysiosphaera | 0,44 | 0,44 | 0,13 | 1,42  | 0,52 | 29,73 |
| Salinimicrobium          | 0,44 | 0,32 | 0,13 | 1,24  | 0,51 | 30,23 |

### Groups PKA & ST

Average dissimilarity = 22,74

|                    | Group PKA | Group ST |         |         |          |       |
|--------------------|-----------|----------|---------|---------|----------|-------|
| Species            | Av.Abund  | Av.Abund | Av.Diss | Diss/SD | Contrib% | Cum.% |
| Noviherbaspirillum | 1,06      | 0,00     | 0,44    | 3,80    | 1,93     | 1,93  |
| Arthrobacter       | 0,63      | 1,35     | 0,42    | 1,65    | 1,85     | 3,78  |
| Bdellovibrio       | 0,00      | 0,75     | 0,31    | 2,39    | 1,37     | 5,15  |
| Massilia           | 1,44      | 0,87     | 0,31    | 1,51    | 1,35     | 6,50  |
| Nafulsella         | 0,74      | 0,00     | 0,31    | 1,72    | 1,34     | 7,84  |
| Virgibacillus      | 0,21      | 0,79     | 0,31    | 1,57    | 1,34     | 9,18  |
| Achromobacter      | 0,26      | 0,73     | 0,24    | 1,92    | 1,04     | 10,22 |
| Unassigned         | 2,16      | 1,74     | 0,24    | 2,08    | 1,04     | 11,26 |
| Kocuria            | 0,00      | 0,58     | 0,24    | 1,08    | 1,04     | 12,30 |
| Flavobacterium     | 0,67      | 1,11     | 0,23    | 1,74    | 1,01     | 13,31 |
| Pseudomonas        | 0,76      | 1,15     | 0,20    | 1,52    | 0,87     | 14,17 |
| Bacteriovorax      | 0,08      | 0,55     | 0,19    | 2,40    | 0,85     | 15,03 |
| Allostreptomyces   | 0,00      | 0,43     | 0,18    | 1,95    | 0,78     | 15,81 |
| TM7a               | 0,52      | 0,82     | 0,18    | 1,38    | 0,78     | 16,59 |
| Roseisolibacter    | 0,43      | 0,00     | 0,18    | 7,76    | 0,78     | 17,37 |
| Microvirga         | 2,08      | 1,80     | 0,16    | 1,00    | 0,72     | 18,09 |
| Bacillus           | 1,12      | 0,95     | 0,16    | 1,53    | 0,70     | 18,79 |

|                          |      |      |      |      |      |       |
|--------------------------|------|------|------|------|------|-------|
| Ideonella                | 0,14 | 0,52 | 0,16 | 2,42 | 0,69 | 19,48 |
| Knoellia                 | 0,56 | 0,48 | 0,15 | 1,36 | 0,68 | 20,16 |
| Rhizobacter              | 0,67 | 1,01 | 0,15 | 1,20 | 0,66 | 20,82 |
| Candidatus_Alysiosphaera | 0,31 | 0,44 | 0,15 | 1,31 | 0,66 | 21,48 |
| Actinoplanes             | 0,48 | 0,58 | 0,14 | 1,26 | 0,63 | 22,11 |
| Lechevalieria            | 0,65 | 0,59 | 0,14 | 1,01 | 0,62 | 22,72 |
| Pontibacillus            | 0,00 | 0,34 | 0,14 | 1,85 | 0,61 | 23,34 |
| BIy10                    | 0,73 | 0,95 | 0,14 | 1,47 | 0,61 | 23,95 |
| Isosphaera               | 0,33 | 0,00 | 0,14 | 1,07 | 0,60 | 24,55 |
| Cystobacter              | 0,55 | 0,59 | 0,13 | 1,22 | 0,59 | 25,14 |
| possible genus 04        | 0,43 | 0,67 | 0,13 | 1,33 | 0,59 | 25,73 |
| Dactylosporangium        | 0,45 | 0,69 | 0,13 | 1,14 | 0,59 | 26,32 |
| Micromonospora           | 0,00 | 0,33 | 0,13 | 1,19 | 0,58 | 26,90 |
| Solirubrobacter          | 0,47 | 0,71 | 0,13 | 1,17 | 0,58 | 27,48 |
| Pseudarthrobacter        | 3,07 | 2,77 | 0,13 | 1,62 | 0,56 | 28,04 |
| Salinimicrobium          | 0,46 | 0,32 | 0,12 | 1,17 | 0,55 | 28,59 |
| Nonomuraea               | 0,55 | 0,81 | 0,12 | 1,50 | 0,55 | 29,13 |
| Prostheco bacter         | 0,06 | 0,36 | 0,12 | 4,26 | 0,54 | 29,67 |
| Streptomyces             | 1,05 | 1,17 | 0,12 | 0,92 | 0,52 | 30,19 |

### Groups PA & ST

Average dissimilarity = 22,82

|                        | Group PA | Group ST |         |         |          |        |
|------------------------|----------|----------|---------|---------|----------|--------|
| Species                | Av.Abund | Av.Abund | Av.Diss | Diss/SD | Contrib% | Cum. % |
| Arthrobacter           | 0,57     | 1,35     | 0,41    | 1,68    | 1,79     | 1,79   |
| Phormidesmis ANT.L52.6 | 0,79     | 0,07     | 0,31    | 1,29    | 1,37     | 3,17   |
| Virgibacillus          | 0,22     | 0,79     | 0,30    | 1,60    | 1,32     | 4,48   |
| Bdellovibrio           | 0,12     | 0,75     | 0,26    | 1,91    | 1,14     | 5,63   |
| Acidovorax             | 0,76     | 0,20     | 0,26    | 1,57    | 1,14     | 6,77   |
| Phormidium_CYN64       | 0,63     | 0,00     | 0,26    | 1,13    | 1,12     | 7,89   |
| Unassigned             | 2,33     | 1,74     | 0,25    | 1,55    | 1,07     | 8,96   |
| Actinoplanes           | 0,00     | 0,58     | 0,24    | 1,69    | 1,04     | 10,00  |
| Kocuria                | 0,00     | 0,58     | 0,23    | 1,08    | 1,02     | 11,02  |
| Verrucomicrobium       | 0,62     | 0,14     | 0,22    | 1,10    | 0,97     | 11,99  |
| Achromobacter          | 0,41     | 0,73     | 0,21    | 1,36    | 0,93     | 12,92  |
| Flavobacterium         | 0,78     | 1,11     | 0,21    | 1,93    | 0,91     | 13,83  |
| Lechevalieria          | 0,22     | 0,59     | 0,19    | 1,52    | 0,82     | 14,65  |
| Allostreptomyces       | 0,00     | 0,43     | 0,18    | 1,95    | 0,77     | 15,42  |
| TM7a                   | 0,59     | 0,82     | 0,17    | 1,47    | 0,74     | 16,16  |
| Roseisolibacter        | 0,40     | 0,00     | 0,17    | 1,72    | 0,72     | 16,88  |
| Solirubrobacter        | 0,34     | 0,71     | 0,16    | 1,21    | 0,70     | 17,59  |

|                          |      |      |      |       |      |       |
|--------------------------|------|------|------|-------|------|-------|
| Microvirga               | 1,99 | 1,80 | 0,15 | 0,98  | 0,66 | 18,25 |
| Bacillus                 | 0,95 | 0,95 | 0,15 | 1,49  | 0,66 | 18,91 |
| Candidatus Entotheonella | 0,34 | 0,57 | 0,15 | 1,45  | 0,65 | 19,56 |
| possible genus_04        | 0,30 | 0,67 | 0,15 | 1,94  | 0,65 | 20,21 |
| Ideonella                | 0,66 | 0,52 | 0,15 | 1,36  | 0,64 | 20,86 |
| TX1A-55                  | 0,35 | 0,00 | 0,14 | 10,10 | 0,63 | 21,49 |
| Candidatus Alysiosphaera | 0,37 | 0,44 | 0,14 | 1,36  | 0,61 | 22,10 |
| Rubrobacter              | 1,78 | 2,08 | 0,14 | 1,29  | 0,59 | 22,69 |
| Glycomyces               | 0,17 | 0,43 | 0,13 | 1,61  | 0,59 | 23,27 |
| Cellvibrio               | 0,47 | 0,76 | 0,13 | 1,25  | 0,58 | 23,85 |
| Salinimicrobium          | 0,00 | 0,32 | 0,13 | 1,15  | 0,57 | 24,42 |
| Knoellia                 | 0,37 | 0,48 | 0,13 | 1,28  | 0,56 | 24,98 |
| Streptomyces             | 1,08 | 1,17 | 0,12 | 0,98  | 0,54 | 25,52 |
| Micromonospora           | 0,39 | 0,33 | 0,12 | 1,16  | 0,54 | 26,05 |
| Adhaeribacter            | 1,04 | 0,75 | 0,12 | 1,72  | 0,53 | 26,58 |
| Stenotrophobacter        | 0,46 | 0,17 | 0,12 | 2,30  | 0,52 | 27,10 |
| Corallococcus            | 0,29 | 0,00 | 0,12 | 1,93  | 0,52 | 27,62 |
| Nonomuraea               | 0,61 | 0,81 | 0,12 | 1,75  | 0,51 | 28,13 |
| Kribbella                | 0,55 | 0,45 | 0,12 | 1,07  | 0,51 | 28,63 |
| Cohnella                 | 0,09 | 0,36 | 0,12 | 2,17  | 0,51 | 29,14 |
| Nostoc_PCC-73102         | 0,70 | 0,45 | 0,11 | 1,11  | 0,50 | 29,64 |
| Cystobacter              | 0,66 | 0,59 | 0,11 | 1,38  | 0,49 | 30,13 |

### Groups PD & ST

Average dissimilarity = 22,84

|                    | Group PD | Group ST |         |         |          |       |
|--------------------|----------|----------|---------|---------|----------|-------|
| Species            | Av.Abund | Av.Abund | Av.Diss | Diss/SD | Contrib% | Cum.% |
| Arthrobacter       | 1,03     | 1,35     | 0,38    | 1,59    | 1,64     | 1,64  |
| Virgibacillus      | 0,42     | 0,79     | 0,28    | 2,38    | 1,23     | 2,87  |
| Bdellovibrio       | 0,07     | 0,75     | 0,28    | 2,15    | 1,22     | 4,09  |
| Kocuria            | 0,88     | 0,58     | 0,25    | 1,32    | 1,10     | 5,19  |
| Sanguibacter       | 0,62     | 0,00     | 0,25    | 1,68    | 1,10     | 6,29  |
| Streptosporangium  | 0,83     | 0,32     | 0,24    | 1,27    | 1,03     | 7,32  |
| TM7a               | 0,33     | 0,82     | 0,23    | 1,39    | 1,02     | 8,34  |
| Brachybacterium    | 0,56     | 0,00     | 0,22    | 1,75    | 0,98     | 9,33  |
| Flavobacterium     | 0,73     | 1,11     | 0,21    | 1,76    | 0,92     | 10,25 |
| Williamsia         | 0,46     | 0,00     | 0,19    | 4,25    | 0,82     | 11,07 |
| Roseisolibacter    | 0,46     | 0,00     | 0,19    | 6,08    | 0,82     | 11,89 |
| Bacteriovorax      | 0,10     | 0,55     | 0,18    | 2,29    | 0,81     | 12,69 |
| Noviherbaspirillum | 0,45     | 0,00     | 0,18    | 1,81    | 0,79     | 13,48 |
| Bacillus           | 0,80     | 0,95     | 0,18    | 1,46    | 0,77     | 14,25 |



|                          |      |      |      |      |      |       |
|--------------------------|------|------|------|------|------|-------|
| Achromobacter            | 0,75 | 0,73 | 0,17 | 1,27 | 0,73 | 14,99 |
| BIyi10                   | 0,61 | 0,95 | 0,15 | 1,45 | 0,68 | 15,66 |
| Pseudorhodoferrax        | 0,38 | 0,00 | 0,15 | 1,76 | 0,66 | 16,33 |
| Cystobacter              | 0,53 | 0,59 | 0,15 | 1,39 | 0,66 | 16,98 |
| Knoellia                 | 0,82 | 0,48 | 0,15 | 1,37 | 0,66 | 17,64 |
| Microvirga               | 2,01 | 1,80 | 0,15 | 0,97 | 0,65 | 18,29 |
| Psychrobacillus          | 0,37 | 0,00 | 0,15 | 6,76 | 0,64 | 18,94 |
| Candidatus Alysiosphaera | 0,33 | 0,44 | 0,15 | 1,31 | 0,64 | 19,57 |
| possible_genus_04        | 0,34 | 0,67 | 0,14 | 1,53 | 0,62 | 20,20 |
| Nonomuraea               | 0,54 | 0,81 | 0,13 | 1,66 | 0,59 | 20,79 |
| Micromonospora           | 0,33 | 0,33 | 0,13 | 1,29 | 0,59 | 21,37 |
| Verrucomicrobium         | 0,41 | 0,14 | 0,13 | 1,58 | 0,58 | 21,95 |
| Tychonema CCAP 1459-11B  | 0,68 | 0,42 | 0,13 | 1,64 | 0,58 | 22,54 |
| Cellulomonas             | 0,62 | 0,33 | 0,13 | 1,47 | 0,56 | 23,10 |
| Pontibacter              | 0,55 | 0,62 | 0,12 | 1,38 | 0,55 | 23,64 |
| Nodularia PCC-9350       | 0,29 | 0,48 | 0,12 | 1,94 | 0,54 | 24,18 |
| Phytohabitans            | 0,31 | 0,00 | 0,12 | 0,92 | 0,54 | 24,73 |
| Actinoplanes             | 0,77 | 0,58 | 0,12 | 1,11 | 0,54 | 25,26 |
| Quadrisphaera            | 0,47 | 0,19 | 0,12 | 1,70 | 0,53 | 25,80 |
| Allostreptomyces         | 0,23 | 0,43 | 0,12 | 1,35 | 0,53 | 26,32 |
| Taibaiella               | 0,33 | 0,49 | 0,12 | 1,76 | 0,51 | 26,84 |
| Nakamurella              | 0,29 | 0,00 | 0,12 | 1,94 | 0,51 | 27,35 |
| Streptomyces             | 0,95 | 1,17 | 0,12 | 0,79 | 0,51 | 27,86 |
| Sphingourantiacus        | 0,28 | 0,00 | 0,11 | 5,54 | 0,49 | 28,36 |
| Salinimicrobium          | 0,20 | 0,32 | 0,11 | 1,64 | 0,49 | 28,85 |
| Mycobacterium            | 0,46 | 0,71 | 0,11 | 1,03 | 0,49 | 29,34 |
| Microbacterium           | 0,28 | 0,00 | 0,11 | 1,89 | 0,49 | 29,82 |
| Glycomyces               | 0,27 | 0,43 | 0,11 | 1,51 | 0,48 | 30,30 |
